# Supplementary material for: Kommunal verankerte Versorgungsstrukturen zur Förderung der Ernährungsgesundheit in den ersten 1000 Tagen – eine Analyse des aktuellen Status quo
Source: Springer Nature journal article supplement (doi:10.1007/s11553-022-00998-2), 2022-11-28
Supplement: MOESM2 [file 23763522]

Tabelle S2 Ausgeschlossene (kommunal verankerte) Projekte

| <b>Titel</b>                                                                                                             | <b>Träger</b>                                | <b>Grund für Ausschluss</b>                                        |
|--------------------------------------------------------------------------------------------------------------------------|----------------------------------------------|--------------------------------------------------------------------|
| AGIL - Aktiver Gesünder Is(s)t Leichter                                                                                  | Kinderschutzbund Aachen                      | - richtet sich an Kinder von 4-10 Jahren                           |
| Fit im Leben – mit Spaß und Karla dabei!                                                                                 | Verbandsgemeinde Hillesheim/Vulkaneifel      | - richtet sich hauptsächlich an ältere Kinder                      |
| Gesundheit jetzt – in sozialen Brennpunkten                                                                              | Armut und Gesundheit in Deutschland e.V.     | - nicht primäre Zielgruppe                                         |
| Kinderleicht-Quartier - stärken. Was wirkt!                                                                              | Verein Gesundheitshaus Gelsenkirchen e.V.    | - richtet sich eher an ältere Kinder                               |
| Macht euch auf die Socken                                                                                                | Kreis Herford - Der Landrat – Gesundheit     | - richtet sich eher an ältere Kinder                               |
| Medizinische Versorgung und gesundheitsfördernde Angebote in der Gütersloher Suppenküche und der Kinderküche "die Insel" | Landeszentrum Gesundheit Nordrhein-Westfalen | - Kein Präventionsprogramm                                         |
| optiSTART                                                                                                                | Stadt Leipzig, Gesundheitsamt                | - nicht primäre Zielgruppe<br>- richtet sich eher an ältere Kinder |
| TigerKids - Kindergarten aktiv                                                                                           | Stiftung Kindergesundheit                    | - nicht primäre Zielgruppe<br>- richtet sich eher an ältere Kinder |
